# Supplementary material for: Role and mechanism of Pim-2 kinase inhibitor-induced immunogenic cell death in multiple myeloma
Source: Research Square preprint supplement (doi:10.21203/rs.3.rs-5730658/v1), 2025-01-01
Supplement: Supplementary file 1 [file bd1e864f5334fb711d737b27.docx]

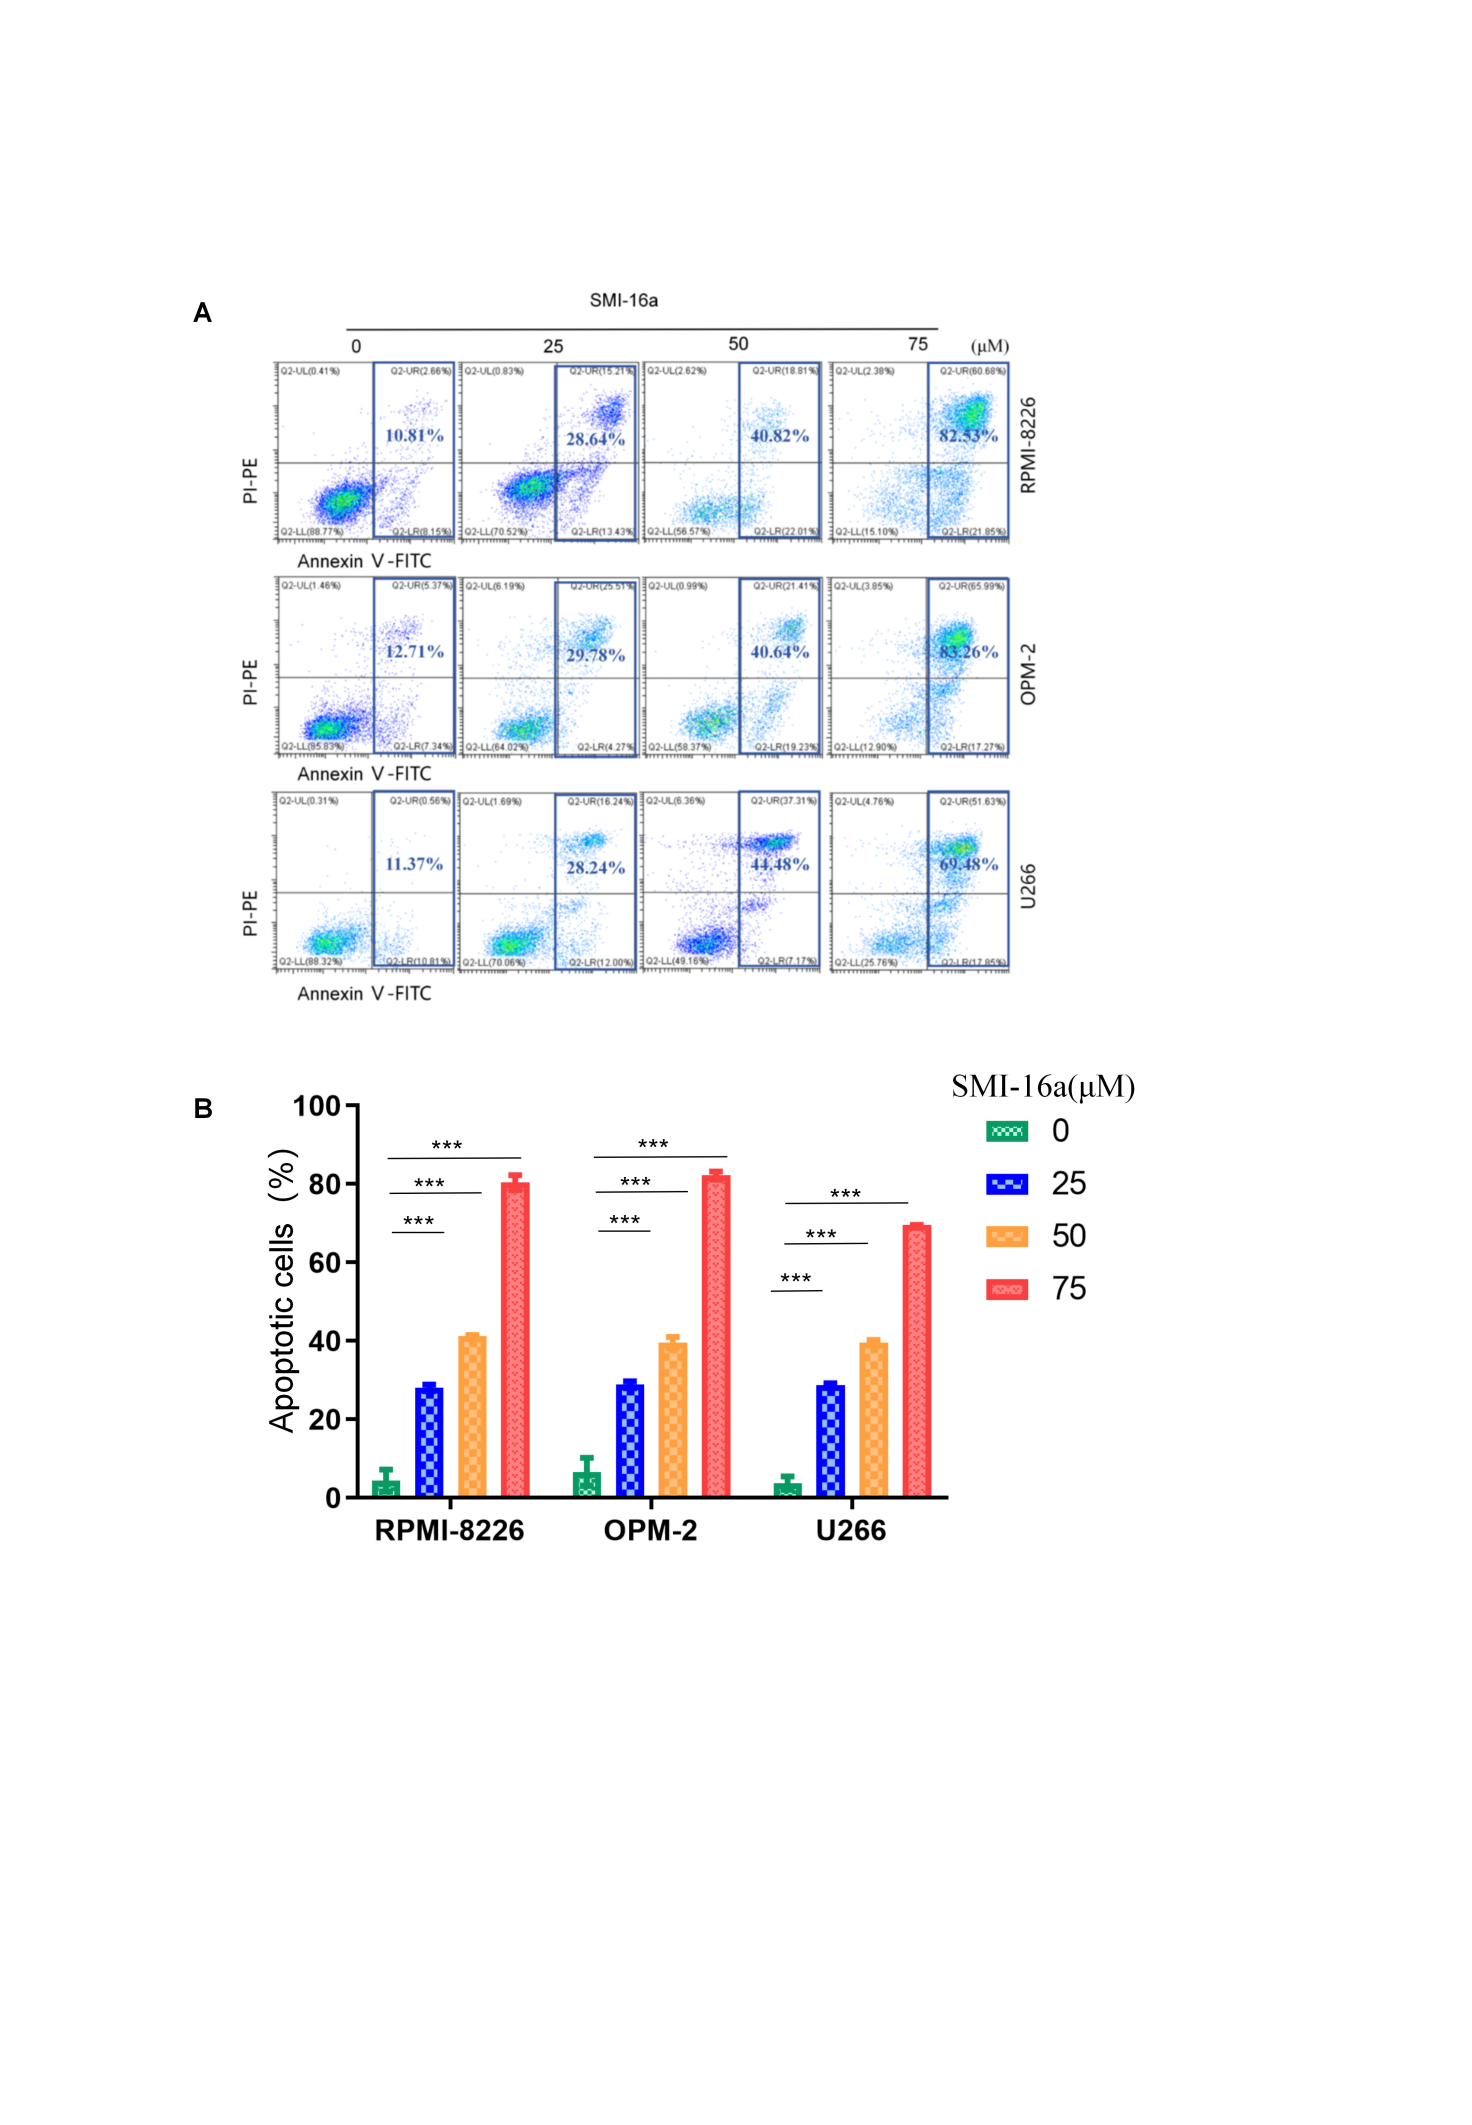


Figure S1 Different concentrations of SMI-16a induced apoptosis in MM cells

1. .Flow pattern of apoptotic MM cells. (B). Statistical plot of MM cell apoptosis. .(* For comparison with normal control, p <0.05, * * compared with normal control, p <0.01, * * * compared with normal control, p <0.001. )


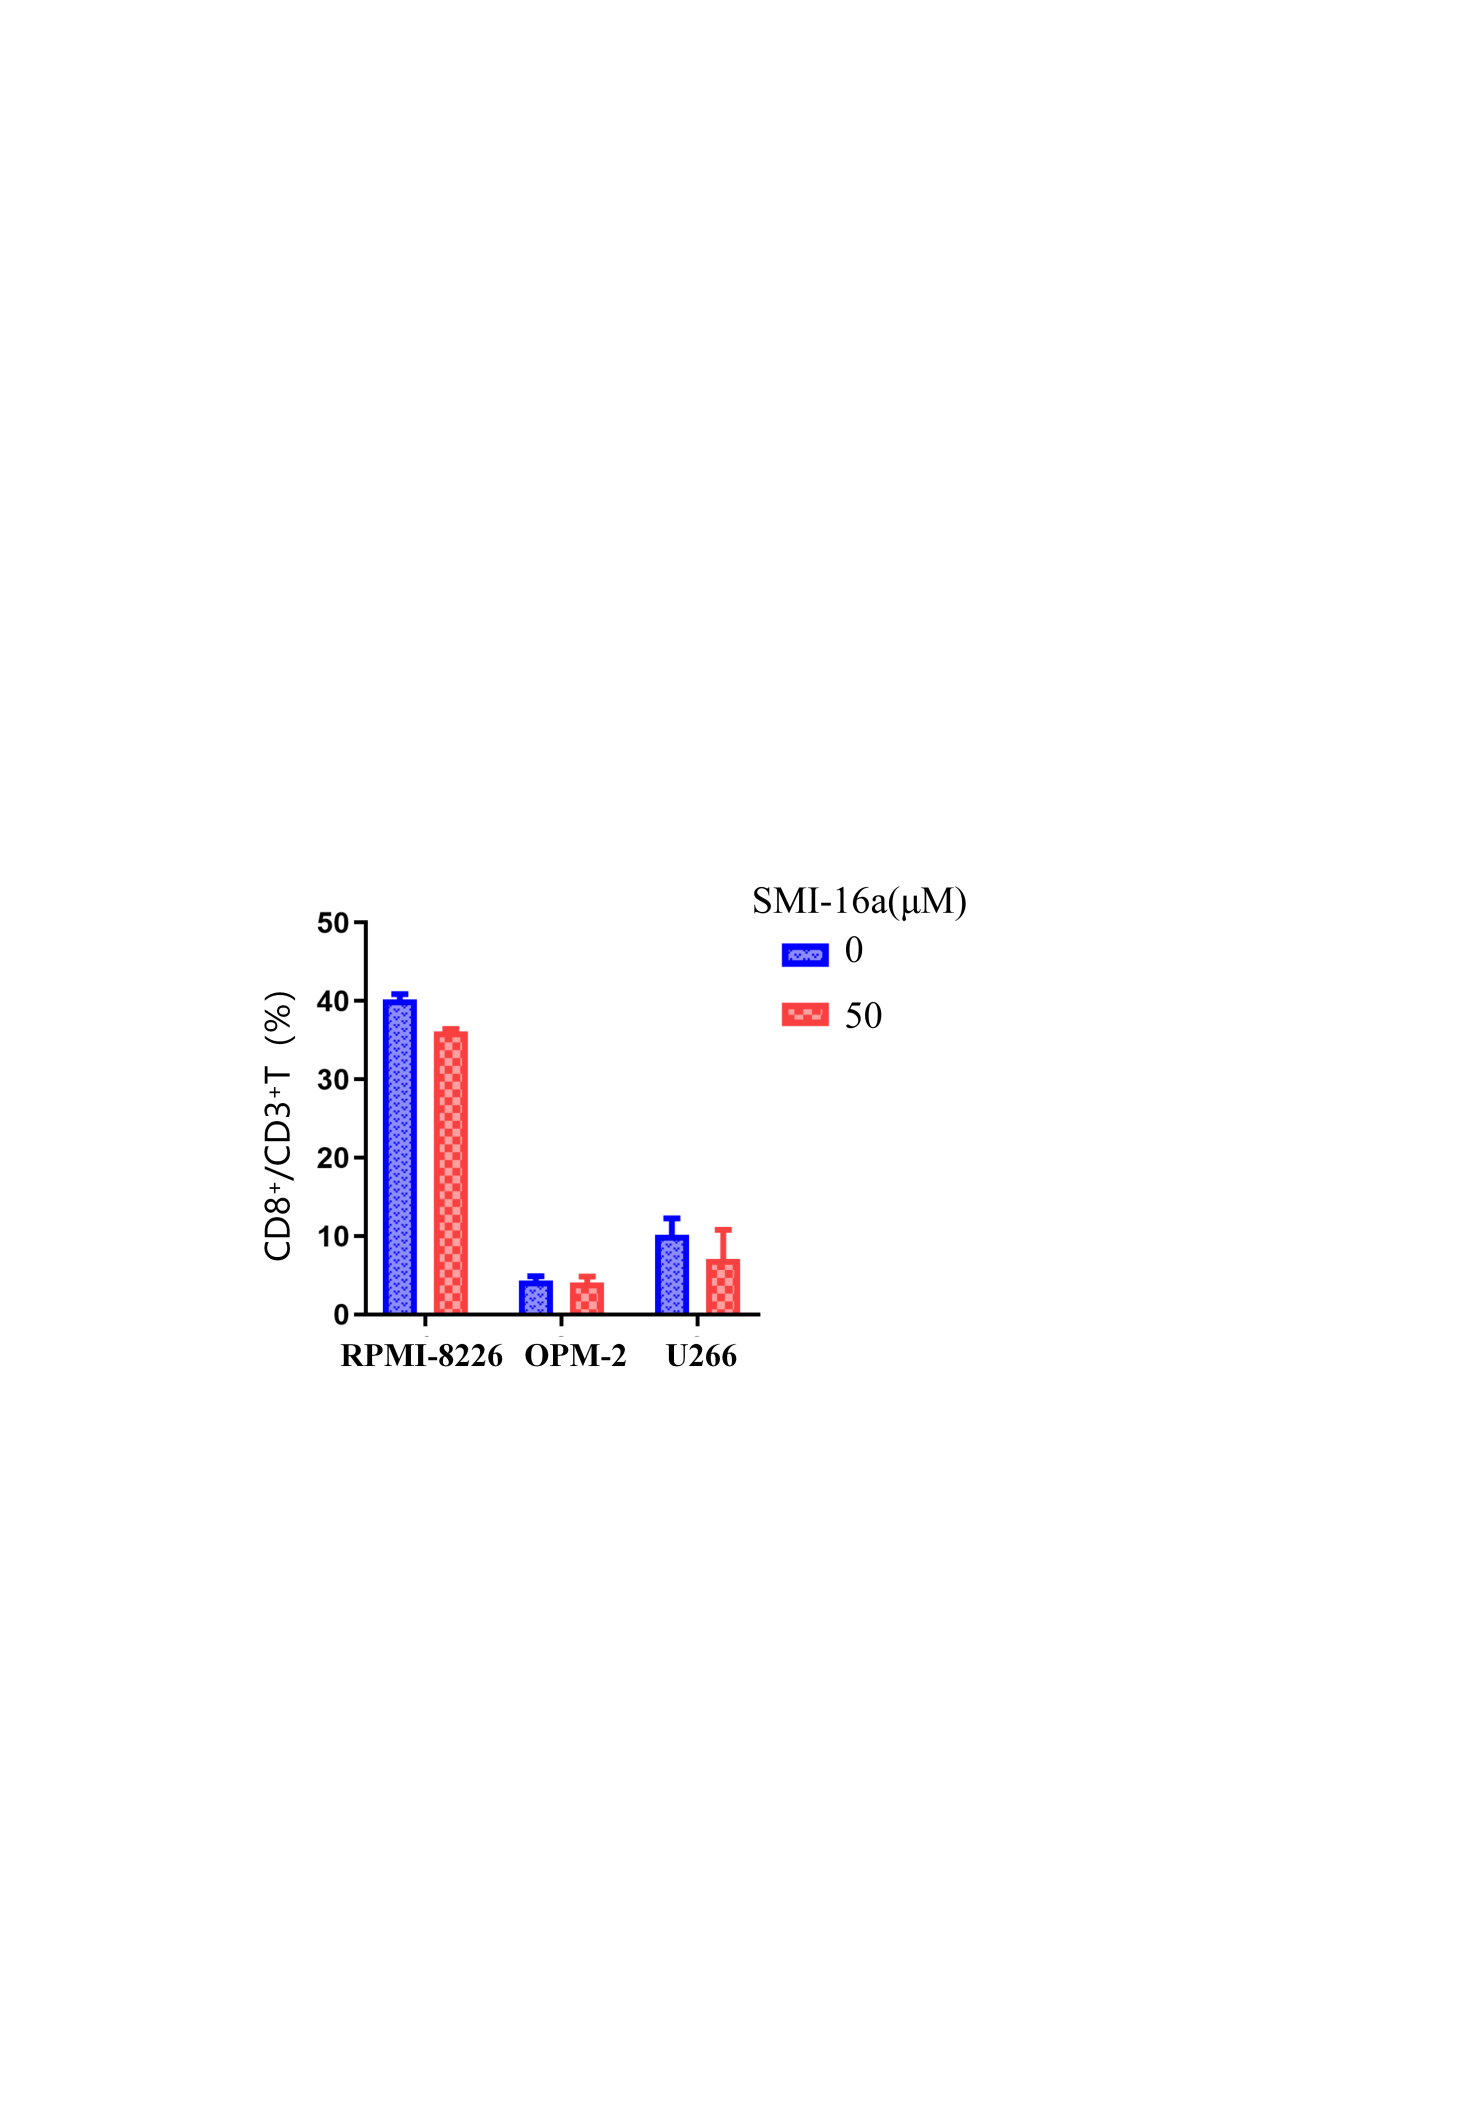


Figure S2 Statistical plot of the ratio of CD8+ / CD3+ T lymphocytes.
